# Supplementary material
Source: HighWire-hosted journal article supplement (http://www.cmaj.ca/highwire/filestream/69395/field_highwire_adjunct_files/0/170385-res-1-at.pdf)
Supplement: 170385-res-1-at.pdf [file 170385-res-1-at.pdf]

## Appendix 1 (as supplied by the authors): List of ICD-9 and ICD-10 codes for PMH-related events:

- **Chronic obstructive pulmonary diseases (COPD)**
  - Any most responsible diagnosis (MRDx) code of  
**ICD-9/9CM:** 491, 492, 494, 496  
**ICD-10-CA:** J41, J42, J43, J44, J47
  - MRDx of Acute lower respiratory infection, only when a secondary diagnosis<sup>1</sup> of J44 in ICD-10-CA or 496 in ICD-9/9CM is also present  
**ICD-9/9CM:** 466, 480 – 486, 487.0  
**ICD-10-CA:** J10.0, J11.0, J12-J16, J18, J20, J21, J22
- **Asthma**  
**ICD-9/9CM:** 493  
**ICD-10-CA:** J45
- **Diabetes**  
**ICD-9:** 250.0, 250.1, 250.2, 250.7  
**ICD-9-CM:** 250.0, 250.1, 250.2, 250.8  
**ICD-10-CA:** E10.0<sup>^^</sup>, E10.1<sup>^^</sup>, E10.63, E10.64, E10.9<sup>^^</sup>  
E11.0<sup>^^</sup>, E11.1<sup>^^</sup>, E11.63, E11.64, E11.9<sup>^^</sup>  
E13.0<sup>^^</sup>, E13.1<sup>^^</sup>, E13.63, E13.64, E13.9<sup>^^</sup>  
E14.0<sup>^^</sup>, E14.1<sup>^^</sup>, E14.63, E14.64, E14.9<sup>^^</sup>
- **Heart failure\***  
**ICD-9/9CM:** 428, 518.4  
**ICD-10-CA:** I50, J81  
\*Excluding cases with cardiac procedures
- **Hypertension\***  
**ICD-9/9CM:** 401.0, 401.9, 402.0, 402.1, 402.9  
**ICD-10-CA:** I10.0, I10.1, I11  
\*Excluding cases with cardiac procedures
- **Coronary Disease (Angina)\***  
**ICD-9:** 411, 413  
**ICD-9-CM:** 411.1, 411.8, 413  
**ICD-10-CA:** I20, I23.82, I24.0, I24.8, I24.9  
\*Excluding cases with cardiac procedures

### List of cardiac procedure codes<sup>2</sup> for exclusion:

**CCP:** 47^^, 480^-483^, 4891, 4899, 492^-495^, 497^, 498^

**ICD-9-CM:** 336, 35^^, 36^^, 373^, 375^, 377^, 378^, 3794-3798

**CCI:** 1HA58, 1HA80, 1HA87, 1HB53, 1HB54, 1HB55, 1HB87, 1HD53, 1HD54, 1HD55, 1HH59, 1HH71, 1HJ76, 1HJ82, 1HM57, 1HM78, 1HM80, 1HN71, 1HN80, 1HN87, 1HP76, 1HP78, 1HP80, 1HP82, 1HP83, 1HP87, 1HR71, 1HR80, 1HR84, 1HR87, 1HS80, 1HS90, 1HT80, 1HT89, 1HT90, 1HU80, 1HU90, 1HV80, 1HV90, 1HW78, 1HW79, 1HX71, 1HX78, 1HX79, 1HX80, 1HX83, 1HX86, 1HX87, 1HY85, 1HZ53 rubric (**except** 1HZ53LAKP), 1HZ55 rubric (**except** 1HZ55LAKP), 1HZ56, 1HZ57, 1HZ59, 1HZ80, 1HZ85, 1HZ87, 1IF83, 1IJ50, 1IJ55, 1IJ57, 1IJ76, **1IJ86**, 1IJ80, 1IK57, 1IK80, 1IK87, 1IN84, 1LA84, 1LC84, 1LD84, 1YY54LANJ
